# Supplementary material for: Correction: A Low Dose of Dietary Resveratrol Partially Mimics Caloric Restriction and Retards Aging Parameters in Mice
Source: PubMed Central journal article supplement (PMC2656690; doi:10.1371/annotation/c54ef754-1962-4125-bf19-76d3ec6f19e5), 2008-06-23
Supplement: pone.c54ef754-1962-4125-bf19-76d3ec6f19e5.s001.pdf [file pone.c54ef754-1962-4125-bf19-76d3ec6f19e5.s001.pdf]

# Supplemental Figure 2

## DNA Oxidation

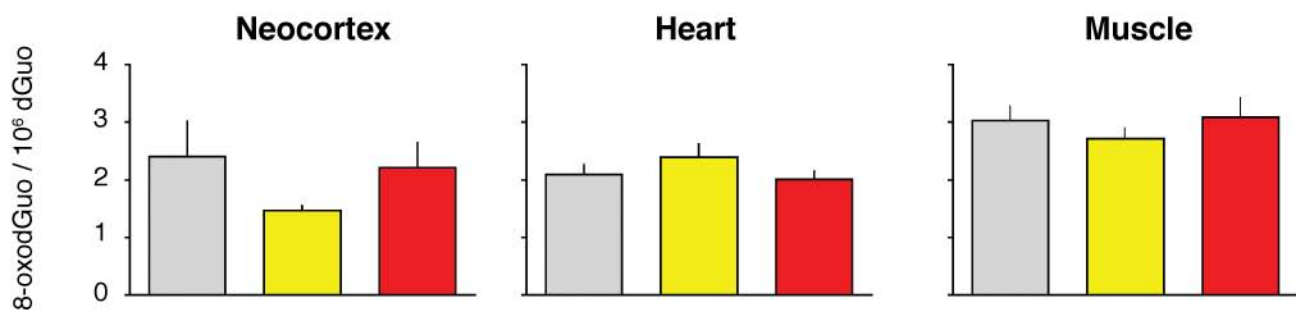

## RNA Oxidation

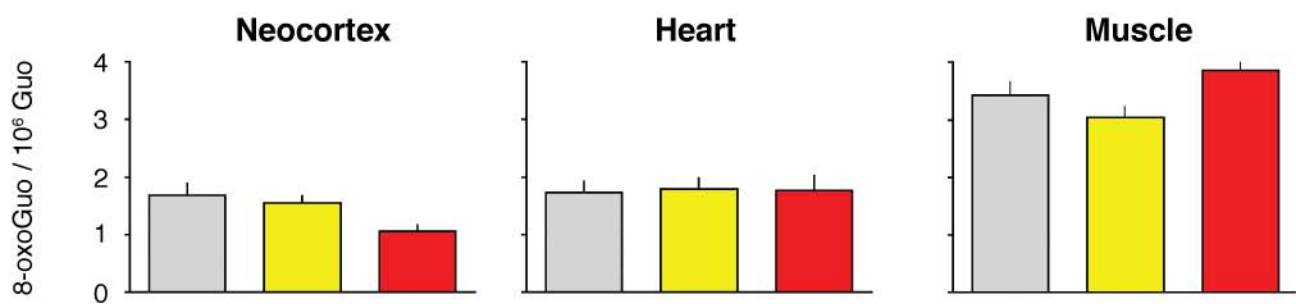

## Bound F Isoprostanes

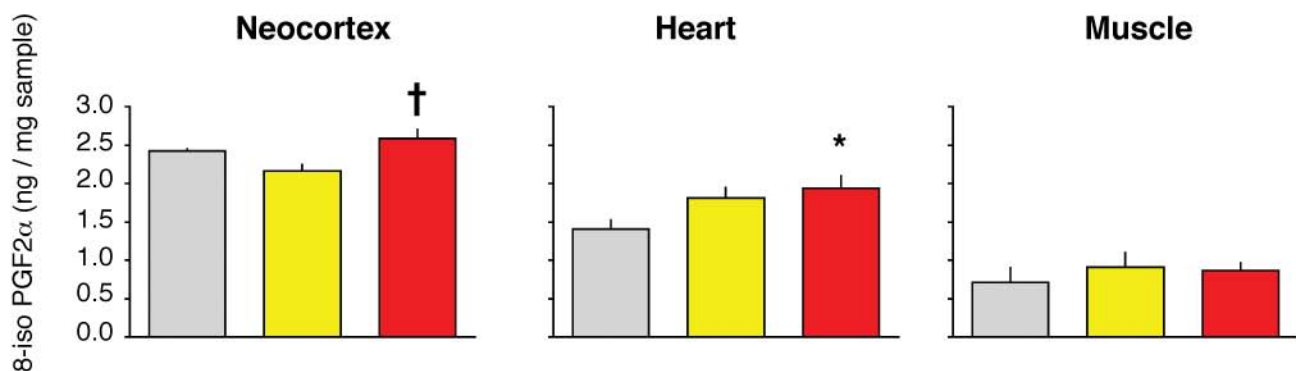

Young Control

CR

Resv
